# Supplementary material for: Hovenia dulcis Fruit Peduncle Polysaccharides Reduce Intestinal Dysbiosis and Hepatic Fatty Acid Metabolism Disorders in Alcohol-Exposed Mice
Source: MDPI journal article supplement (doi:10.3390/foods13081145), 2024-04-09
Supplement: s1 [file s1]

## *Supplementary Material*

### **1 Supplementary Figures**

#### **1.1 Figure S1**

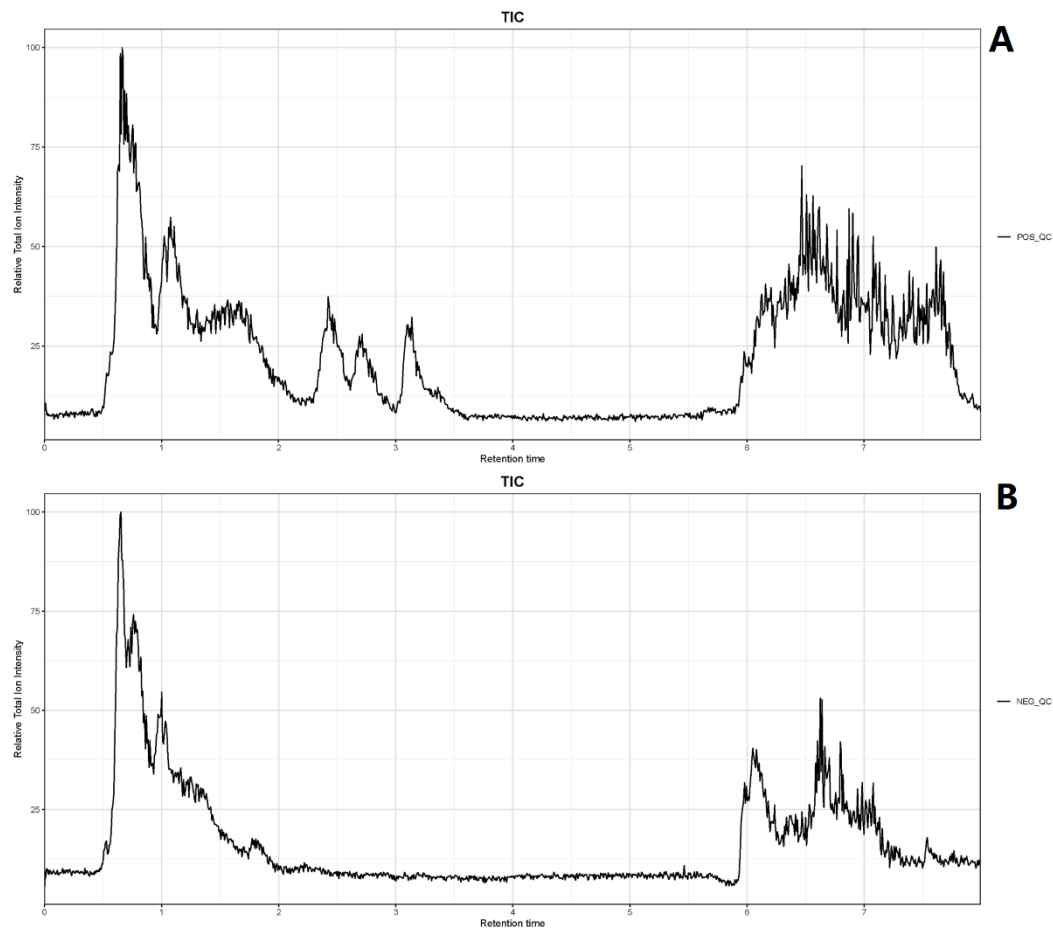

**Figure S1.** The ion chromatogram in quality control samples. (A) Positive model; (B) Negative model.

## 1.2 Figure S2

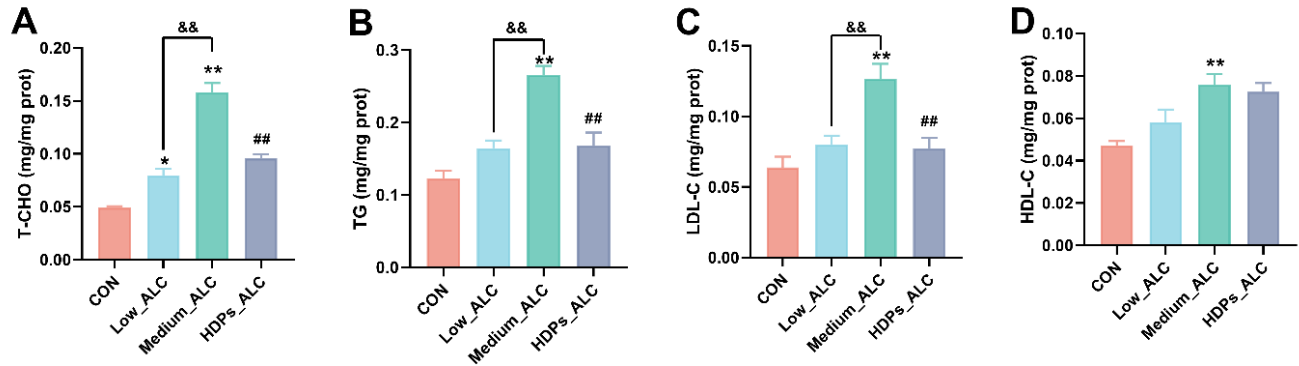

**Figure S2.** Effect of HDPs on serum lipid levels in alcohol-exposed mice. (A) serum T-CHO; (B) serum TG; (C) serum LDL-C; (D) serum HDL-C. \* $p < 0.05$ , \*\* $p < 0.01$  compared with the CON group; && $p < 0.01$  compared with the Low\_ALC group; ## $p < 0.01$  compared with the Medium\_ALC group.

## 1.3 Figure S3

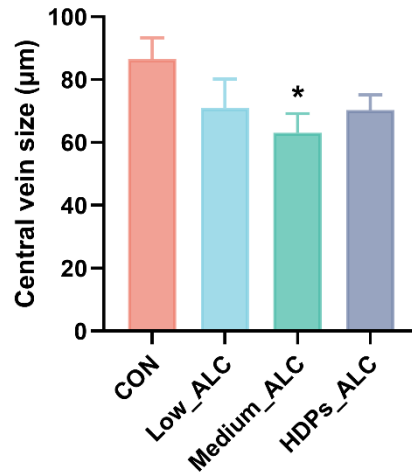

**Figure S3.** Central vein size quantification (μm) in the liver. At least 5 central veins were randomly selected from pathologic tissue scan sections of the liver, and their sizes were measured by NanoZoomer Digital Pathology software to obtain the mean values. Compared with the CON group, \* $p < 0.05$ .

#### 1.4 Figure S4

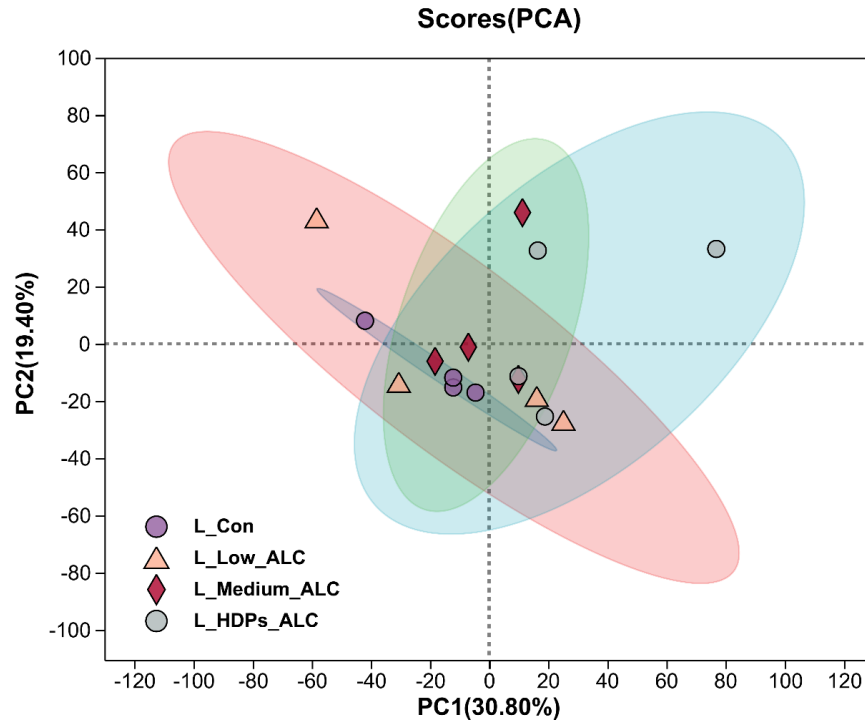

**Figure S4.** Principal component analysis (PCA) score plots visualized the results from PCA discrimination analysis. A confidence ellipse indicates that the "true" samples in this group are distributed within this region at the 95% confidence level; beyond this region, the samples may be anomalous.

## 1.5 Figure S5

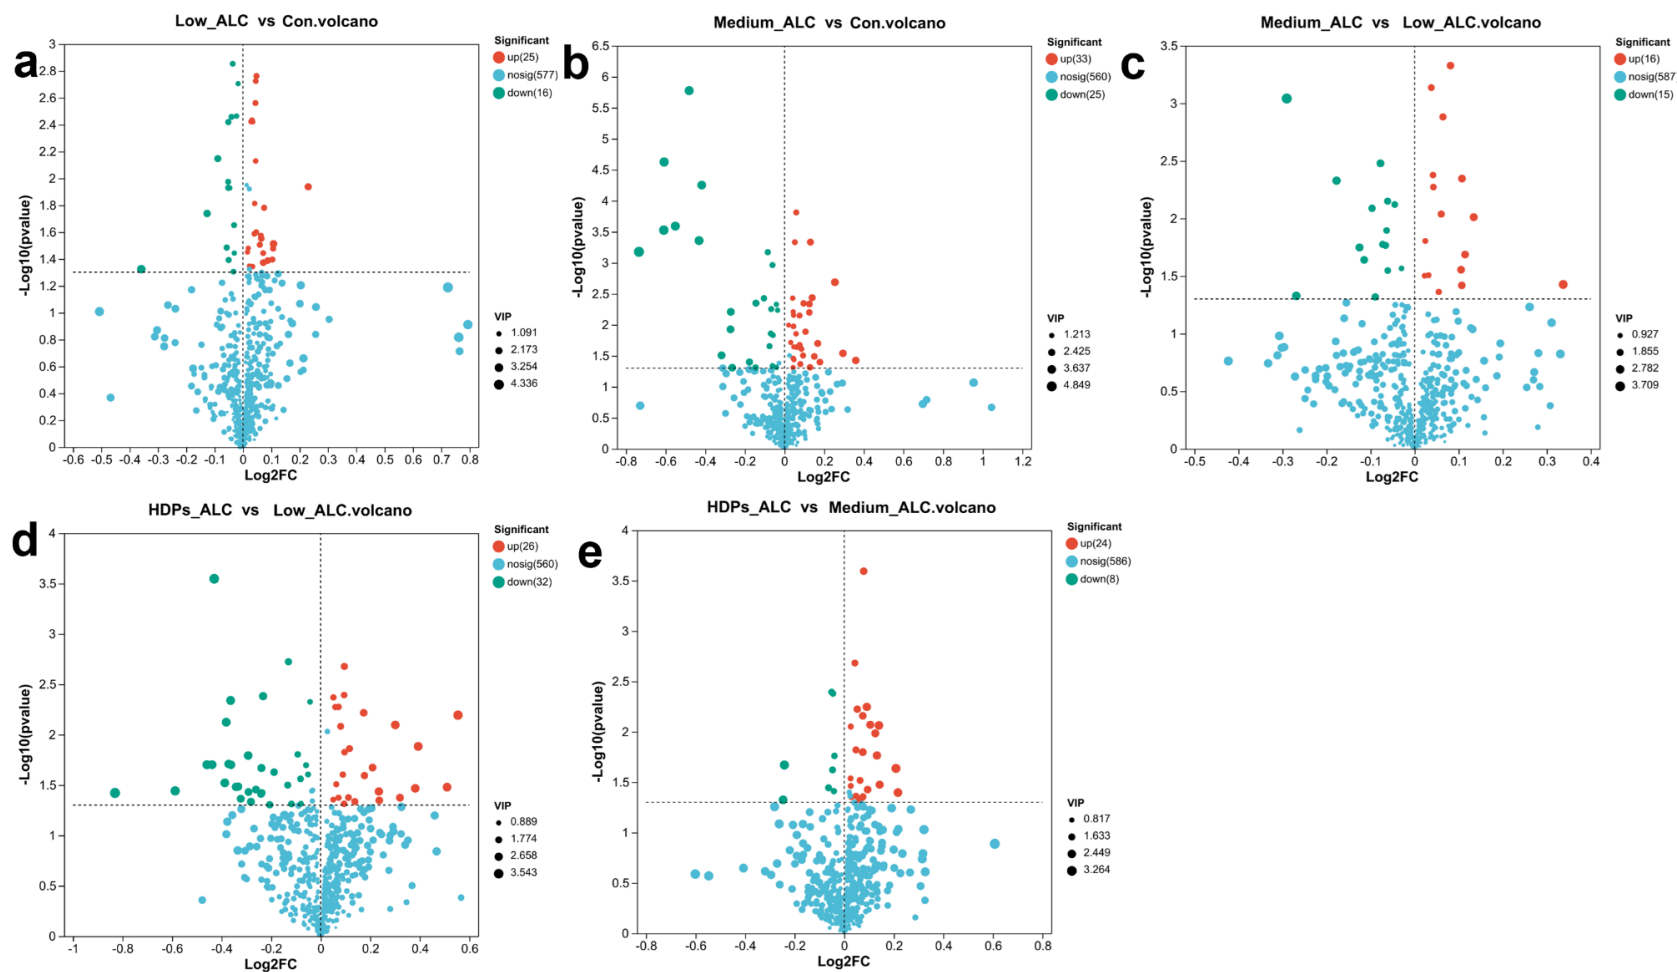

**Figure S5.** Volcanic map of differential metabolites in positive ion mode. a: Low\_ALC vs CON (up 25, down 16), b: Medium\_ALC vs CON (up 33, down 25), c: Medium\_ALC vs Low\_ALC (up 16, down 15), d: HDPs\_ALC vs Low\_ALC (up 26, down 32), e: HDPs\_ALC vs Medium\_ALC (up 24, down 8).

## 2 Supplementary Tables

### 2.1 Table S1

**Table S1.** The monosaccharide composition of the HDPs (mol%)

| <b>Fuc</b> | <b>Ara</b> | <b>Rha</b> | <b>Gal</b> | <b>Glc</b> | <b>Xyl</b> | <b>Man</b> | <b>Gal-UA</b> | <b>Glc-UA</b> |
|------------|------------|------------|------------|------------|------------|------------|---------------|---------------|
| 0.55       | 11.41      | 5.15       | 14.15      | 60.66      | 2.48       | 2.90       | 2.10          | 0.62          |

The monosaccharide composition of HDPs by high performance anion exchange chromatography (HPAEC) is shown in Table S1. The results showed that the HDPs were acidic polysaccharides and complex in structure, and their major monosaccharide components consisted of fucose, rhamnose, arabinose, galactose, glucose, Xylose, mannose, galacturonic acid, and glucuronic acid, with the following percentages (mol%): 0.55%, 11.41%, 5.15%, 14.15%, 60.66%, 2.48, 2.9%, 2.10%, and 0.62%, respectively.

## 2.2 Table S2

**Table S2.** Alpha diversity analysis (n = 4).

| <b>Estimators</b> | <b>Con</b>    | <b>Low_ALC</b> | <b>Medium_ALC</b> | <b>HDPs_ALC</b> |
|-------------------|---------------|----------------|-------------------|-----------------|
| ace               | 376.8 ± 128.1 | 249.6 ± 126.3  | 137.0 ± 115.4*    | 242.7 ± 101.8   |
| chao              | 357.6 ± 126.5 | 250.6 ± 124.3  | 126.5 ± 116.4*    | 236.9 ± 98.3    |
| shannon           | 2.12 ± 0.675  | 2.11 ± 0.675   | 1.55 ± 0.578*     | 1.69 ± 0.131    |
| sobs              | 297.5 ± 122.5 | 221.3 ± 122.5  | 108.8 ± 112.4*    | 215.8 ± 85.5    |

Compared with the CON group, \*p < 0.05.

## 2.3 Table S3

**Table S3.** Identified metabolites C00157 and C04230 involved in arachidonic acid metabolism, glycerophospholipid metabolism, and linoleic acid metabolism.

| KEGG<br>Compound ID | Metabolite                                    | Metab ID   | Formula    | Retention<br>time | HMDB Class           | M/Z    |
|---------------------|-----------------------------------------------|------------|------------|-------------------|----------------------|--------|
| C00157              | PC(18:3(9Z,12Z,15Z)/20:0)                     | metab_541  | C46H86NO8P | 7.21              | Glycerophospholipids | 834.60 |
| C00157              | PC(18:1(9Z)/14:1(9Z))                         | metab_1029 | C40H76NO8P | 6.34              | Glycerophospholipids | 730.54 |
| C00157              | PC(18:0/18:3(9Z,12Z,15Z))                     | metab_1220 | C44H82NO8P | 6.99              | Glycerophospholipids | 784.58 |
| C00157              | PC(16:1(9Z)/22:5(7Z,10Z,13Z,16Z,19Z))         | metab_1274 | C46H80NO8P | 7.31              | Glycerophospholipids | 806.57 |
| C00157              | PC(16:0/18:2(9Z,12Z))                         | metab_1730 | C42H80NO8P | 7.19              | Glycerophospholipids | 758.57 |
| C00157              | GPCCho(20:4/16:0)                             | metab_1781 | C44H80NO8P | 6.99              | Glycerophospholipids | 804.55 |
| C00157              | PC(18:1(9Z)/22:6(4Z,7Z,10Z,13Z,16Z,19Z))      | metab_1992 | C48H82NO8P | 6.44              | Glycerophospholipids | 832.58 |
| C00157              | PC(18:3(9Z,12Z,15Z)/22:5(7Z,10Z,13Z,16Z,19Z)) | metab_4046 | C48H80NO8P | 7.00              | Glycerophospholipids | 830.57 |
| C00157              | PC(20:4(8Z,11Z,14Z,17Z)/16:1(9Z))             | metab_4060 | C44H78NO8P | 7.21              | Glycerophospholipids | 780.55 |
| C00157              | PC(22:5(7Z,10Z,13Z,16Z,19Z)/14:0)             | metab_4078 | C44H78NO8P | 7.51              | Glycerophospholipids | 780.55 |
| C00157              | PC(18:2(9Z,12Z)/22:5(7Z,10Z,13Z,16Z,19Z))     | metab_4093 | C48H82NO8P | 7.66              | Glycerophospholipids | 832.58 |
| C00157              | PC(18:3(9Z,12Z,15Z)/16:0)                     | metab_4142 | C42H78NO8P | 7.61              | Glycerophospholipids | 756.55 |
| C04230              | PC(18:0/0:0)                                  | metab_575  | C26H54NO7P | 7.62              | Glycerophospholipids | 524.37 |
| C04230              | LysoPC(P-18:1(9Z)/0:0)                        | metab_1367 | C26H52NO6P | 7.71              | Glycerophospholipids | 538.39 |
| C04230              | PC(16:0/0:0)                                  | metab_1591 | C24H50NO7P | 7.65              | Glycerophospholipids | 518.32 |
| C04230              | LysoPC(17:0/0:0)                              | metab_1740 | C25H52NO7P | 7.16              | Glycerophospholipids | 510.35 |
| C04230              | LysoPC(20:2(11Z,14Z)/0:0)                     | metab_1782 | C28H54NO7P | 6.99              | Glycerophospholipids | 548.37 |
| C04230              | 2-Lysophosphatidylcholine                     | metab_1886 | C26H54NO7P | 6.67              | Glycerophospholipids | 546.35 |
| C04230              | LysoPC(20:5(5Z,8Z,11Z,14Z,17Z)/0:0)           | metab_1994 | C28H48NO7P | 6.44              | Glycerophospholipids | 542.32 |
| C04230              | LysoPC(18:1(11Z)/0:0)                         | metab_4036 | C26H52NO7P | 6.89              | Glycerophospholipids | 522.35 |
| C04230              | LysoPC(20:1(11Z)/0:0)                         | metab_4086 | C28H56NO7P | 7.62              | Glycerophospholipids | 550.39 |
| C04230              | LysoPC(20:4(8Z,11Z,14Z,17Z)/0:0)              | metab_5285 | C28H50NO7P | 7.55              | Glycerophospholipids | 588.33 |
| C04230              | LysoPC(15:0/0:0)                              | metab_5297 | C23H48NO7P | 7.54              | Glycerophospholipids | 480.31 |
| C04230              | LysoPC(16:1(9Z)/0:0)                          | metab_5622 | C24H48NO7P | 6.42              | Glycerophospholipids | 538.32 |
| C04230              | LysoPC(18:3(6Z,9Z,12Z)/0:0)                   | metab_5675 | C26H48NO7P | 6.36              | Glycerophospholipids | 562.31 |
| C04230              | LysoPC(22:6(4Z,7Z,10Z,13Z,16Z,19Z)/0:0)       | metab_6583 | C30H50NO7P | 6.37              | Glycerophospholipids | 612.33 |
| C04230              | LysoPC(20:4(5Z,8Z,11Z,14Z)/0:0)               | metab_6672 | C28H50NO7P | 6.41              | Glycerophospholipids | 588.33 |

|        |                                |            |            |      |                      |        |
|--------|--------------------------------|------------|------------|------|----------------------|--------|
| C04230 | 1-Palmitoylphosphatidylcholine | metab_6816 | C24H50NO7P | 6.67 | Glycerophospholipids | 540.33 |
| C04230 | LysoPC(16:0/0:0)               | metab_6867 | C24H50NO7P | 7.54 | Glycerophospholipids | 540.33 |



### 3 Supplementary Texts

#### 3.1 Text S1 Chromatographic conditions and mass spectrometry conditions.

**Chromatographic conditions:** the column was ACQUITY UPLC HSS T3 (100 mm × 2.1 mm, 1.8 μm; Waters, Milford, USA); mobile phase A was 95% water + 5% acetonitrile (containing 0.1% formic acid), and mobile phase B was 47.5% acetonitrile + 47.5% isopropanol + 5% water (containing 0.1% formic acid); the injection volume was 3 μL, and the column temperature was 40 °C. **Mass spectrometry conditions:** the sample is ionized by electrospray ionization, and the mass spectrometry signals are collected in positive and negative ion scanning modes, respectively.
